# Supplementary material
Source: Springer Nature journal article supplement (https://www.springermedizin.de/resource/supplementary/12955_2010_711_MOESM2_ESM.pdf/9561156)
Supplement: MOESM2 [file 9561156]

### **Search Strategy**

Searched MEDLINE, CINAHL, HAPI, EMBASE and PsycINFO databases from 1980-2006 for instruments related to the *Episodic Disability Framework*

### **Reviewed 4274 Abstracts**

Reviewed abstracts for instruments that met inclusion criteria

### **34 Instruments Identified for Inclusion**

**4 Instruments Unable to Retrieve from Authors**

### **Document Analysis of 30 Instruments**

Each item from all the 30 instruments were assigned a code (72 codes represented categories of dimensions of disability and 36 represented contextual factors, triggers, and content extraneous to disability)

### **Coding Validity Check**

Items from a random sub-set of 8 of the included instruments were coded by a community-based author for comparison

### **Mapped Items from the Instruments onto a Matrix**

Mapped items according to the category (or code) they represented within the *Episodic Disability Framework*
